# Supplementary material for: The evolution of same-sex sexual behaviour in mammals
Source: Springer Nature journal article supplement (doi:10.1038/s41467-023-41290-x), 2023-10-03
Supplement: 41467_2023_41290_MOESM3_ESM.pdf [file 41467_2023_41290_MOESM3_ESM.pdf]

### **Description of Additional Supplementary Files**

File Name: Supplementary Data 1

Description: List of species with records on same-sex sexual behaviour

File Name: Supplementary Data 2

Description: List of species from which we have information on same-sex sexual behaviour, sociality and adulticide (see Figure S1). Sampling\_effort refers to number of citations per species (see Methods)
